# Supplementary material for: Highly active Ce, Y, La-modified Cu/SiO2 catalysts for hydrogenation of methyl acetate to ethanol
Source: RSC Adv. 2020 Feb 4;10(10):5590–603. doi: 10.1039/c9ra08780j (PMC9049221; doi:10.1039/c9ra08780j)
Supplement: RA-010-C9RA08780J-s001 [file RA-010-C9RA08780J-s001.pdf]

## Supporting Information for

### Highly active Ce, Y, La modified Cu/SiO<sub>2</sub> catalysts for hydrogenation of methyl acetate to ethanol

Zhiheng Ren,<sup>abc</sup> Muhammad Naeem Younis,<sup>c</sup> Chunshan Li,<sup>cd\*</sup> Zengxi Li,<sup>e</sup> Xiangui

Yang,<sup>ab\*</sup> Gongying Wang,<sup>ab</sup>

<sup>a</sup> *Chengdu Institute of Organic Chemistry, Chinese Academy of Sciences, Chengdu,*

*610041, China. E-mail: [yangxg@cioc.ac.cn](mailto:yangxg@cioc.ac.cn).*

<sup>b</sup> *National Engineering Laboratory & Technology, University of Chinese Academy of*

*Science, Beijing 101408, China.*

<sup>c</sup> *CAS Key Laboratory of Green Process and Engineering, State Key Laboratory of  
Multiphase Complex Systems, The National Key Laboratory of Clean and Efficient  
Coking Technology, Beijing Key Laboratory of Ionic Liquids Clean Process, Institute  
of Process Engineering, Chinese Academy of Sciences, Beijing 100190, PR China.*

<sup>d</sup> *Zhongke Langfang Institute of Process Engineering, Hebei Province, PR China*

*E-mail: [csli@ipe.ac.cn](mailto:csli@ipe.ac.cn).*

<sup>e</sup> *School of Chemical Science, University of Chinese Academy of Sciences, Beijing*

*100049, People's Republic of China.*

Table S1. Product analysis from GC-MS.

| Time/min | Product                                                                             | Molecular Weight |
|----------|-------------------------------------------------------------------------------------|------------------|
| 1.32     | 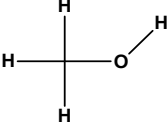   | 32               |
| 1.4      | 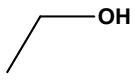   | 46               |
| 1.55     | 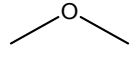   | 46               |
| 1.58     | 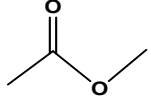   | 74               |
| 1.7      | 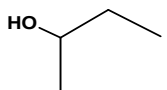   | 74               |
| 1.78     | 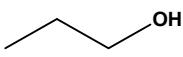   | 60               |
| 1.88     | 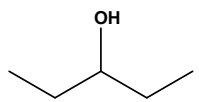  | 88               |
| 1.94     | 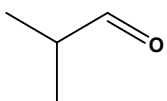 | 72               |
| 2.06     | 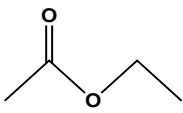 | 88               |
| 2.41     | 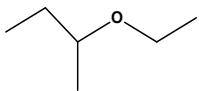 | 102              |
| 2.58     | 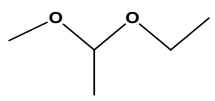 | 104              |

Reaction condition: T=280 °C, P=2.5MPa, GHSV=3000 h<sup>-1</sup>, LHSV=1 h<sup>-1</sup>.

Main Side reaction:

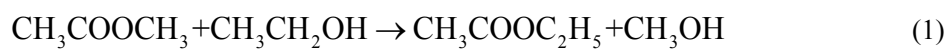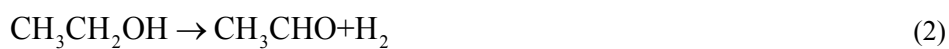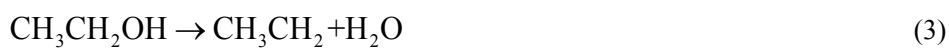

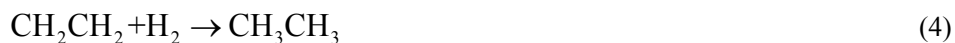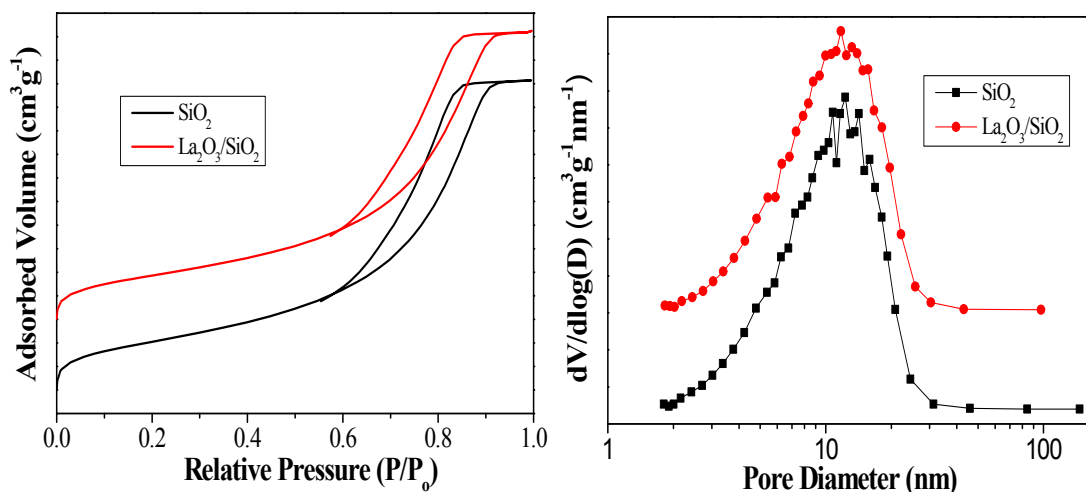

Fig. S1. N<sub>2</sub> adsorption-desorption isotherm and pore distribution of selected SiO<sub>2</sub> and La<sub>2</sub>O<sub>3</sub>/SiO<sub>2</sub>.

Table S2. Grain size of the copper crystallite of different catalyst.

| Catalyst                       | $2\theta$ of 111 Crystal face (°) | $d_{\text{Cu}}$ (nm) |
|--------------------------------|-----------------------------------|----------------------|
| Cu/SiO <sub>2</sub>            | 43.4                              | 4.5                  |
| Cu/SiO <sub>2</sub> -5Ce       | 43.5                              | 4.1                  |
| Cu/SiO <sub>2</sub> -5Y        | 43.5                              | 7.7                  |
| Cu/SiO <sub>2</sub> -1La       | 43.5                              | 3.6                  |
| Cu/SiO <sub>2</sub> -5La       | 43.5                              | 3.5                  |
| Cu/SiO <sub>2</sub> -10La      | 43.5                              | 7.1                  |
| Spent Cu/SiO <sub>2</sub>      | 43.1                              | 8.6                  |
| Spent Cu/SiO <sub>2</sub> -5La | 43.2                              | 5.2                  |

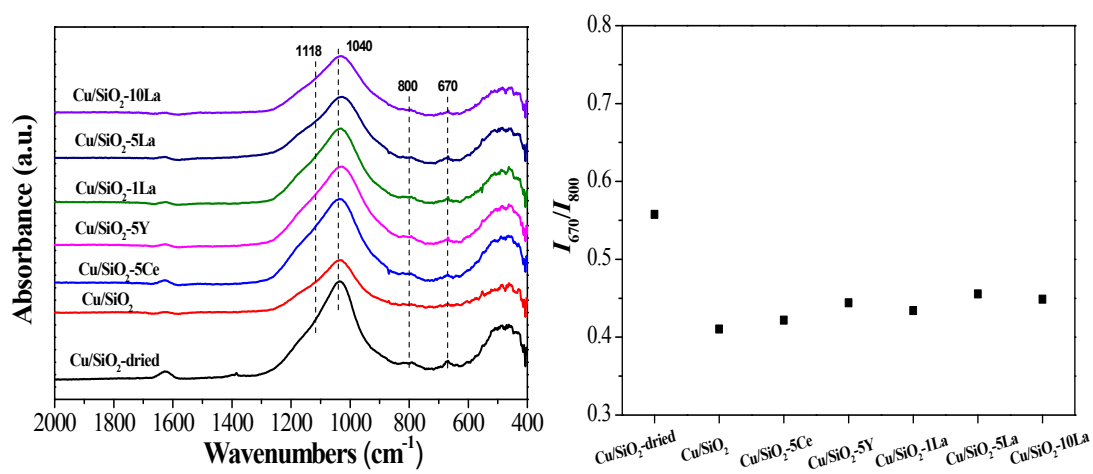

Fig. S2. FTIR spectra of Cu-SiO<sub>2</sub> and Cu/SiO<sub>2</sub>-xM catalysts.

The IR bands of  $\delta_{\text{OH}} = 670 \text{ cm}^{-1}$  and  $\nu_{\text{SiO}} = 1040 \text{ cm}^{-1}$  could be suggested that the presence of copper phyllosilicate phase in all samples, while silica exhibits an asymmetric  $\nu_{\text{SiO}}$  band at  $1118 \text{ cm}^{-1}$  and a symmetric  $\nu_{\text{SiO}}$  band at  $800 \text{ cm}^{-1}$ .  $I_{670}/I_{800}$  is denoted the relative contents of copper phyllosilicate in different catalysts.<sup>1-2</sup> It could be found that the value of different calcined catalyst is almost the same, suggesting the amount of  $\text{Cu}_2\text{SiO}_5(\text{OH})_2$  in different catalyst has no big difference.

[1] T. Toupance, M. Kermarec, C. Louis, *J. Phys. Chem. B* 2000, **104**, 965–972.

[2] H. Yue, Y. Zhao, S. Zhao, B. Wang, X. Ma and J. Gong, *Nat. Commun.*, 2013, **4**, 2339–2345.

## N<sub>2</sub>O titration method

The copper surface area was calculated combined with the results of N<sub>2</sub>O titration and Cu LMM XAES spectra according to previous report.<sup>2-3</sup> Typically, 50 mg of the calcined catalysts were reduced by the same H<sub>2</sub>-TPR procedure described in section 2.2 (denoted as total TPR). After cooling down to 60 °C, the reduced samples were exposed to a pure N<sub>2</sub>O flow (60 mL/min, 1 h) to completely oxidize surface copper atoms into Cu<sub>2</sub>O. Afterwards, the resulting surface oxidized samples underwent the second TPR run as the first one (denoted as surface TPR). The Cu dispersion ( $D_{\text{Cu}}$ ), specific expose Cu surface area ( $S_{\text{Cu}}$ ) were calculated by Eqs. (1) and Eqs. (2), by assuming  $1.47 \times 10^{19}$  copper atoms per square meter. Then the  $S_{\text{Cu}}^+$  ( $S_{\text{Cu}}^0$ ) could be calculated combined the values of  $S_{\text{Cu}}$  and the Cu<sup>+</sup> (Cu<sup>0</sup>) ratio from the results of Cu LMM XAES under the assumption that the Cu<sup>+</sup> ions and Cu<sup>0</sup> atoms occupy identical areas.

$$D_{\text{Cu}}(\%) = \frac{2 \times \text{H}_2 \text{ Consumption (surface TPR)}}{\text{H}_2 \text{ Consumption (total TPR)}} \times 100 \quad (1)$$

$$S_{\text{Cu}}(\text{m}^2 \text{g}^{-1} \text{Cu}) = \frac{D_{\text{Cu}} \times N_{\text{av}}}{M_{\text{Cu}} \times 1.46 \times 10^{19}} \quad (2)$$

Where  $N_{\text{av}}$ : Avogadro constant =  $6.02 \times 10^{23} \text{ (mol}^{-1}\text{)}$ ;  $M_{\text{Cu}}$ : relative atomic mass = 63.55 (g/mol).

[3] Y. Zhao, B. Shan, Y. Wang, J. Zhou, S. Wang and X. Ma, *Ind. Eng. Chem. Res.*, 2018, **57**, 4526–4534.

- [4] P. Ai, M. Tan, P. Reubroycharoen, Y. Wang, X. Feng, G. Liu, G. Yang and N. Tsubaki, *Catal. Sci. Technol.*, 2018, **8**, 6441–6451.

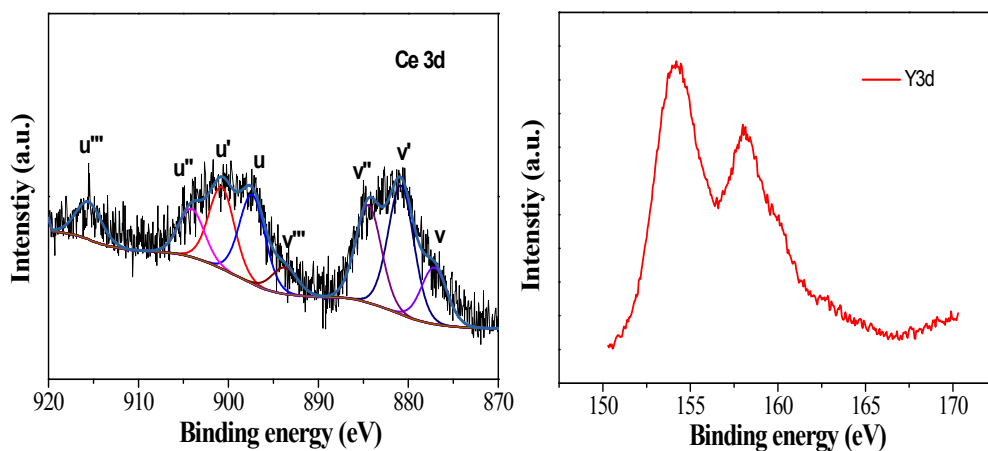

Fig. S3. XPS spectra of Ce 3d and Y 3d.

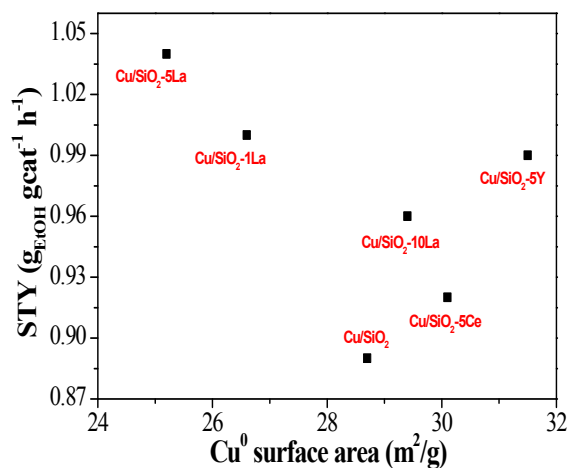

Fig. S4. Effects of  $\text{Cu}^0$  surface area of  $\text{Cu-SiO}_2$  and  $\text{Cu/SiO}_2\text{-xM}$  catalyst on the  $\text{STY}_{\text{EtOH}}$ .

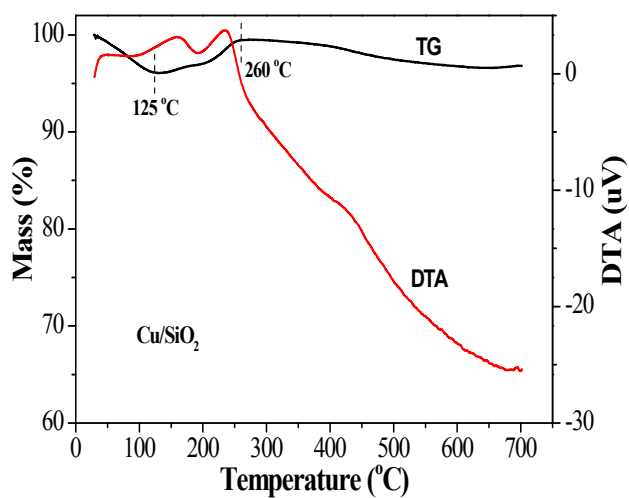

Fig. S5. TG and DTA analysis of spent  $\text{Cu/SiO}_2$  after long-term stability test.

From the result of Figure S5, it could be found that there have three steps in the

whole stage. The first step before 125 °C is related to the weight loss of surface water. After that, the weight has increased might be due to the  $\text{Cu}^+$  species oxidation when exposed to the air. The third step after 260 °C is probably corresponding to the decomposition of CuO. From previous literatures, the carbon deposit would be oxidized at 200-400 °C. But from our results, it could be inferred that the formation of carbon deposition is not obvious.

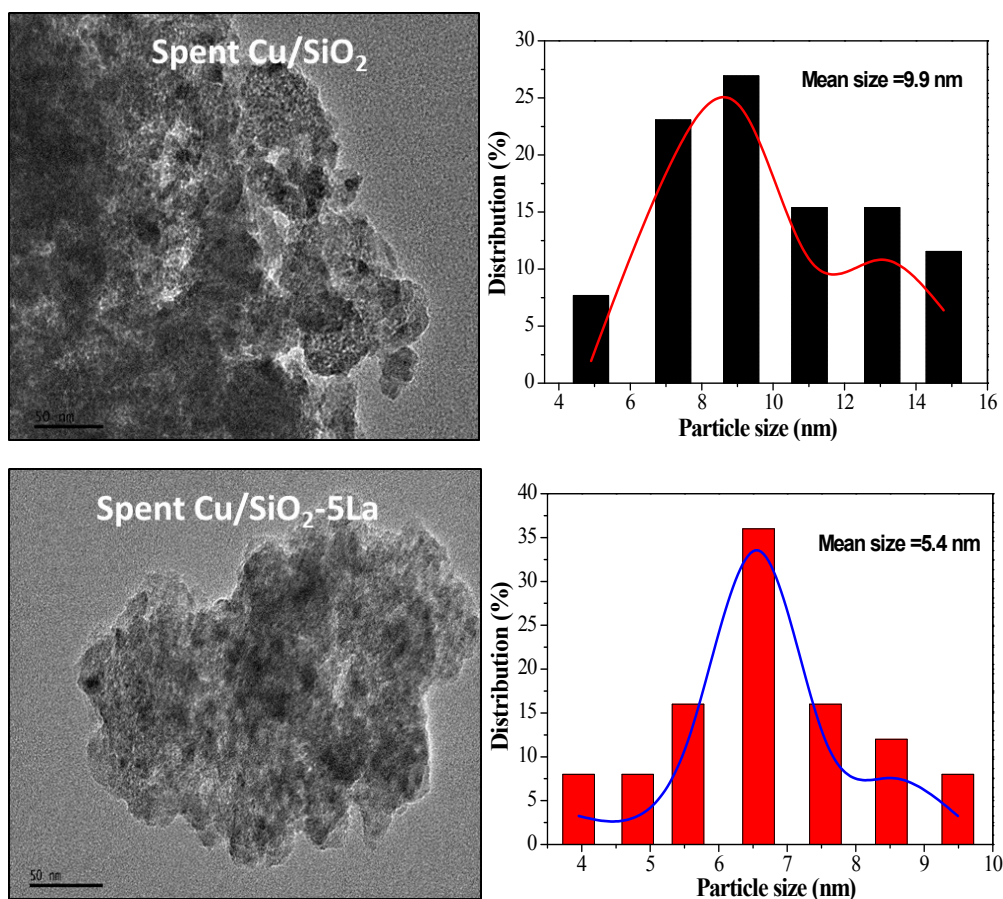

Fig. S6. TEM image of spent Cu/SiO<sub>2</sub> and Cu-/SiO<sub>2</sub>-5La catalyst after long-term estimating.

Table S3. Summary of Cu-based catalysts for hydrogenation of MA to ethanol under different reaction conditions.

| Catalyst                                          | Pressure (Mpa) | LHSV (h <sup>-1</sup> ) | H <sub>2</sub> /MA | Reaction temperature (°C) | MA conversion (%) | Ref.      |
|---------------------------------------------------|----------------|-------------------------|--------------------|---------------------------|-------------------|-----------|
| Cu/SiO <sub>2</sub> -HP                           | 2.5            | 2                       | 15                 | 250                       | 86.8              | This work |
| Cu/SiO <sub>2</sub> -5La-HP                       | 2.5            | 2                       | 15                 | 250                       | 94.3              | This work |
| Cu/SiO <sub>2</sub> -AE                           | 2              | 1                       | <b>40</b>          | 220                       | 80.9              | 5         |
| Cu/SiO <sub>2</sub> -AE                           | <b>3</b>       | 2                       | <b>15</b>          | 250                       | 83.7              | 6         |
| Cu <sub>9</sub> Zn <sub>1</sub> /SiO <sub>2</sub> | 2              | 2                       | <b>20</b>          | 220                       | 92                | 7         |
| Cu <sub>0.9</sub> Zn <sub>0.1</sub> /SBA-15       | 2              | 2                       | <b>20</b>          | 220                       | 85                | 8         |
| Cu@CeO <sub>2</sub>                               | 2.5            | <b>1</b>                | <b>80</b>          | 215                       | 99                | 9         |
| Cu/9MgO-SiO <sub>2</sub>                          | <b>3</b>       | 2                       | 10                 | 340                       | 80.3              | 10        |
| 3Mn-Cu/SiO <sub>2</sub>                           | <b>3</b>       | 2                       | 15                 | 250                       | 96                | 11        |

HP: hydrolysis-precipitation method; AE: ammonia evaporation

[5] X. Dong, X. Ma, H. Xu and Q. Ge, *Catal. Sci. Technol.*, 2016, **6**, 4151–4158.

[6] Y. Zhang, C. Ye, C. Guo, C. Gan and X. Tong, *Chinese J Catal.*, 2018, **39**, 99–108.

[7] Y. Zhao, B. Shan, Y. Wang, J. Zhou, S. Wang and X. Ma, *Ind. Eng. Chem. Res.*, 2018, **57**, 4526–4534.

[8] Y. Wang, J. Liao, J. Zhang, S. Wang, Y. Zhao and X. Ma, *AIChE J*, 2016, **63**, 2839–2849.

[9] Y. Wang, Y. Zhao, J. Lv and X. Ma, *ChemCatChem*, 2017, **9**, 2085–2090.

[10] H. Qin, C. Guo, C. Sun and J. Zhang, *J Mol. Catal. A*, 2015, **409**, 79–84.

[11] C. Ye, C. Guo, C. Sun and Y. Zhang, *RSC Adv.*, 2016, **6**, 113796–113802.
